# Supplementary material for: Challenges and advances in genetic manipulation of filamentous actinomycetes – the remarkable producers of specialized metabolites
Source: Royal Society of Chemistry journal article supplement (doi:10.1039/c9np00029a), 2019-01-01
Supplement: c9np00029a1.pdf [file c9np00029a1.pdf]

# Electronic Supporting Information

## Challenges and advances in genetic manipulation of filamentous actinomycetes – the remarkable producers of specialized metabolites

Ewa M. Musiol-Kroll<sup>a</sup>, Arianna Tocchetti<sup>b</sup>, Margherita Sosio<sup>b, c\*</sup>, and Evi Stegmann<sup>a\*</sup>

<sup>a</sup> University of Tübingen, Interfaculty Institute of Microbiology and Infection Medicine  
Tübingen, Microbiology/Biotechnology, Auf der Morgenstelle 28, 72076, Tübingen, Germany

<sup>b</sup> Naicons Srl, Milan, IT; <sup>c</sup> KtedoGen Srl, Milan, IT

\* co-corresponding author:

Margherita Sosio, [msosio@naicons.com](mailto:msosio@naicons.com);

Evi Stegmann, [evi.stegmann@biotech.uni-tuebingen.de](mailto:evi.stegmann@biotech.uni-tuebingen.de)

**Table S1: List of plasmids according to the *Streptomyces/E. coli* replicon, transposon elements and functions. Selected examples are reported with their properties**

| <b>1. Integrating shuttle plasmids</b> |                                |                                                                                                                                                                                                                                                    |                                                                                                                                                                                                                                                                                                             |                    |
|----------------------------------------|--------------------------------|----------------------------------------------------------------------------------------------------------------------------------------------------------------------------------------------------------------------------------------------------|-------------------------------------------------------------------------------------------------------------------------------------------------------------------------------------------------------------------------------------------------------------------------------------------------------------|--------------------|
| <b><i>E. coli</i> replicon</b>         | <b>Plasmid</b>                 | <b>Features</b>                                                                                                                                                                                                                                    | <b>Comments</b>                                                                                                                                                                                                                                                                                             | <b>References</b>  |
| pUC18                                  | pIJ8600                        | 8.1 kb, <i>oriT</i> RK2, <i>int</i> $\Phi$ C31, <i>attP</i> $\Phi$ C31, <i>P<sub>tipA</sub></i> , <i>t0</i> (terminator from phage $\lambda$ ), <i>tsr</i> , <i>acc(3)IV</i>                                                                       | expression vector (gene expression under the control of the thiostrepton-inducible <i>P<sub>tipA</sub></i> )                                                                                                                                                                                                | 1                  |
| pUC18                                  | pIJ8630 and pIJ8660            | 7.7 kb, <i>int</i> $\Phi$ C31, <i>acc(3)IV</i> , <i>oriT</i> RK2, <i>egfp</i>                                                                                                                                                                      | pIJ8600-derivatives, in which the <i>P<sub>tipA</sub></i> promoter was deleted and <i>egfp</i> was inserted to be used as indicator                                                                                                                                                                         | 1; 2, 3            |
| pIC20R                                 | pKT02                          | 6.078 kb, <i>int</i> VWB, <i>attP</i> (VWB), <i>tsr</i> , <i>bla</i>                                                                                                                                                                               | - integrating vector derived from phage VWB from <i>S. venezuelae</i><br>- integration into the tRNA <sup>Arg</sup>                                                                                                                                                                                         | 4; 5               |
| pUC18                                  | pMT3226                        | 8.4 kb, <i>oriT</i> RK2, <i>attP</i> $\Phi$ C31, <i>int</i> $\Phi$ C31, <i>gylR</i> , <i>xyIE</i> , <i>fdt</i> , <i>bla</i>                                                                                                                        | - integrating expression vector, <i>gylR</i> -cassette for glycerol<br>- inducible gene expression                                                                                                                                                                                                          | 6                  |
| pUC18                                  | pSET152                        | 5.5 kb, <i>oriT</i> RK2, <i>attP</i> ( $\Phi$ C31), <i>int</i> $\Phi$ C31, <i>lacZ<math>\alpha</math></i> , MCS, <i>oriT</i> ,                                                                                                                     | derived from $\Phi$ C31 phage                                                                                                                                                                                                                                                                               | 7; 8               |
| pBR322                                 | pOJ436                         | 11.1 kb, <i>oriT</i> RK2, <i>acc(3)IV</i> , <i>attP</i> ( $\Phi$ C31), <i>int</i> $\Phi$ C31, <i>P<sub>T7</sub></i> / <i>T3</i> (promoters), <i>cos</i> sites,                                                                                     | derived from $\Phi$ C31 phage                                                                                                                                                                                                                                                                               | 7; 9; 10; 11       |
| pBR327                                 | pIJ4201<br>pIJ4210             | 8.1 kb, <i>IS117</i> derivatives, <i>tsr</i> , <i>aphII</i> , <i>orf1</i> , <i>orf2,3</i> only in pIJ4210, <i>attM</i> , <i>bla</i>                                                                                                                | - integrate into specific sites<br>- transposable elements (derived from <i>IS117</i> from <i>S. coelicolor</i> )<br>- pIJ4201 and pIJ4210 differ in the orientation of the resistance genes<br>- the <i>aphIII</i> gene from Tn5 lacks its own promoter                                                    | 12;13              |
| pBR322                                 | pIJ4696,<br>pIJ4698<br>pIJ4700 | pIJ4696: 7.5 kb; pIJ4698: 10.7 kb<br>and pIJ4700: 7.8 kb,<br><i>IS117</i> derivatives, <i>bla</i> , <i>orf1</i> , <i>orf2,3</i> , <i>attM</i> , <i>hph<sup>R</sup></i> in pIJ4696,<br><i>aadA</i> , <i>tsr</i> and <i>aphIII</i> , only in pIJ4698 | - for gene expression<br>- pIJ4698 can be used as positive selection replacement vector                                                                                                                                                                                                                     | 14; 15; 16; 17; 18 |
| pUC18                                  | pSET151                        | 6.2 kb, <i>tsr</i> , <i>xyIE</i> , <i>oriT</i> , <i>lacZ<math>\alpha</math></i> , MCS, <i>aac(3)IV</i>                                                                                                                                             | - non-replicating vector, integration of DNA fragments into specific sites in the chromosome, can be used for reversible integration<br>- derived from pHJL401 by deleting the SCP2* replicon on a Bell fragment and inserting a cassette containing <i>oriT</i> and the <i>xyIE</i> structural gene driven | 7; 19; 20          |

|                                                                      |                                                           |                                                                                                                                                                                                                                             | by <i>P<sub>ermE</sub></i>                                                                                                                                                                                                                                                                                                                                                                                                                                                                                                                                    |                                                                                                  |
|----------------------------------------------------------------------|-----------------------------------------------------------|---------------------------------------------------------------------------------------------------------------------------------------------------------------------------------------------------------------------------------------------|---------------------------------------------------------------------------------------------------------------------------------------------------------------------------------------------------------------------------------------------------------------------------------------------------------------------------------------------------------------------------------------------------------------------------------------------------------------------------------------------------------------------------------------------------------------|--------------------------------------------------------------------------------------------------|
| <b>2. Plasmids grouped according to <i>Streptomyces</i> replicon</b> |                                                           |                                                                                                                                                                                                                                             |                                                                                                                                                                                                                                                                                                                                                                                                                                                                                                                                                               |                                                                                                  |
| <b>pIJ101</b>                                                        |                                                           | 8.8 kb, <i>rep</i> , <i>ori</i> (ds origin for RCR (rolling circle replication), <i>rep</i> , <i>sti</i> , <i>tra</i> , <i>clt</i> , <i>korA</i> , <i>kilA</i> , <i>spdAB</i> , <i>kilB</i> , <i>korB</i> , <i>orf56</i> (unknown function) | - replicative plasmid (RCP), approx. 300 copies per chromosome<br>- pock formation in <i>S. lividans</i> and <i>S. coelicolor</i>                                                                                                                                                                                                                                                                                                                                                                                                                             | 21; 22                                                                                           |
|                                                                      | pIJ699                                                    | 9.5 kb, <i>ori</i> pA15 ( <i>E. coli</i> replicon), <i>P<sub>tet</sub></i> (Promoter), <i>vph</i> , <i>aphII</i> , <i>ter</i> (terminator sequence), <i>ter</i> , <i>tsr</i>                                                                | - positive selection vector<br>- replicative plasmid, which can be used for gene expression<br>- the pA15 replicon is removed during the cloning procedure and the obtained hybrid plasmids replicate only in actinomycetes (mainly <i>Streptomyces</i> )<br>- selection on neomycin/kanamycin is only possible in <i>E. coli</i> not in actinomycetes<br>- Self-religation after removing the „stuffer“ fragment leads to the generation of a fragment with a perfect palindrome from the inverted <i>fd ter</i> sequence, rendering the plasmid “invisible” | 23                                                                                               |
|                                                                      | pIJ702                                                    | 5.65 kb, $\Delta traB$                                                                                                                                                                                                                      | - cloning vector                                                                                                                                                                                                                                                                                                                                                                                                                                                                                                                                              | 21; 24                                                                                           |
|                                                                      | pIJ486<br>pIJ487                                          | 6.2 kb, $\Delta traB$                                                                                                                                                                                                                       | - cloning vector (the two vectors differ for the MCS orientation)<br>- is lost spontaneously                                                                                                                                                                                                                                                                                                                                                                                                                                                                  | 25; 26                                                                                           |
|                                                                      | pIJ303                                                    | $\Delta traB$ deleted                                                                                                                                                                                                                       | - ts, (lost at 37°C)                                                                                                                                                                                                                                                                                                                                                                                                                                                                                                                                          | 27; 28;                                                                                          |
|                                                                      | pMT660                                                    | 5.6 kb, $\Delta traB$                                                                                                                                                                                                                       | - ts, derivative of pIJ702                                                                                                                                                                                                                                                                                                                                                                                                                                                                                                                                    | 29                                                                                               |
|                                                                      | pWHM3                                                     | 7.2 kb, $\Delta traB$ , <i>ori</i> pU18                                                                                                                                                                                                     | - vector for knockouts<br>- unstable replicon                                                                                                                                                                                                                                                                                                                                                                                                                                                                                                                 | 30; 31                                                                                           |
|                                                                      | pHZ1351<br>and<br>pHZ1358                                 | 8.0 kb, $\Delta traB$<br>10 kb, deletion of the stability region                                                                                                                                                                            | - vector for knockouts<br>- pIJ101 with deleted region between <i>sti</i> and <i>rep</i>                                                                                                                                                                                                                                                                                                                                                                                                                                                                      | 6; 32                                                                                            |
|                                                                      | pANT1200-<br>1202                                         | pANT1200: 8 kb, pANT1201: 6.6 kb, pANT1202: 6.3 kb<br><i>ori</i> (pUC), <i>rep</i> (pIJ101), resistance gene(s),<br><i>ter</i> sequences, <i>snpA</i> promoter, <i>snpR</i> gene                                                            | - expression vectors<br>- pANT1200: <i>bla</i> and <i>tsr</i><br>- pANT1201: <i>aphII</i> (kanamycin resistance gene under the control of the <i>acc(3)IV</i> promoter)<br>- pANT1202: <i>acc(3)IV</i>                                                                                                                                                                                                                                                                                                                                                        | 6; 33                                                                                            |
| <b>pSG5</b>                                                          |                                                           | 12.2 kb<br>replicative, conjugative plasmid,<br>naturally temperature sensitive (ts) plasmid<br>(replication stops above 34°C)                                                                                                              | - expression vectors<br>- multicopy plasmid (copy number 20-50)<br>- wide range within <i>Streptomyces</i>                                                                                                                                                                                                                                                                                                                                                                                                                                                    | 34; 35; 36                                                                                       |
|                                                                      | pSG5<br>derivatives<br>pCZA185,<br>pKC1139,<br>pGM series | contain only <i>rep</i> gene and ds <i>ori</i> of pSG5                                                                                                                                                                                      | - pSG5 derivatives are extremely useful for transposon delivery, for gene description and gene replacement by including homologues regions<br>- in most cases replicative vectors                                                                                                                                                                                                                                                                                                                                                                             | - pGM series <sup>34; 35; 36</sup><br>- pKC1139 <sup>7; 37</sup><br>- pCZA185 1994 <sup>38</sup> |

|              |         |                                                                                                                                                                |                                                                                                                                                                                                                                                                                                                                                                                                                                                                       |                        |
|--------------|---------|----------------------------------------------------------------------------------------------------------------------------------------------------------------|-----------------------------------------------------------------------------------------------------------------------------------------------------------------------------------------------------------------------------------------------------------------------------------------------------------------------------------------------------------------------------------------------------------------------------------------------------------------------|------------------------|
|              | pHZ132  | 10.1 kb cosmid, <i>ori</i> (pAT153), <i>vph</i> , <i>cos</i> site, <i>oriT</i> ), <i>tsr</i> , <i>bla</i>                                                      | - bifunctional pSG5 derivative (shuttle plasmid)<br>- for gene expression                                                                                                                                                                                                                                                                                                                                                                                             |                        |
| <b>SCP2*</b> |         | 31.4 kb<br>transposase-like protein, regions for replication ( <i>rep</i> ),<br>stability and transfer                                                         | - low copy number plasmid                                                                                                                                                                                                                                                                                                                                                                                                                                             | 39; 40; 41; 42; 43; 44 |
|              | pSCP103 | 24.5 kb<br>SCP2*-derivative with deleted fragment of approx. 4 kb<br>(PstI-A + B fragments circularised in their native<br>configuration)                      | - lack of partition function (in stable, do not contain stability region)                                                                                                                                                                                                                                                                                                                                                                                             | 45; 41; 42             |
|              | pIJ922  | 24.0 kb, <i>tsr</i> , <i>traA</i>                                                                                                                              | - pSCP103 derivative                                                                                                                                                                                                                                                                                                                                                                                                                                                  | 46; 42; 47             |
|              | pIJ698  | 29.9 kb, pSCP103 derivative<br><i>aphIII</i> , <i>vph</i> , pA15, <i>ter</i> , <i>tsr/hph<sup>R</sup></i> cassette                                             | - shuttle vector (replication in <i>E. coli</i> , p15A)<br>- derived from pSCP103                                                                                                                                                                                                                                                                                                                                                                                     | 42; 23                 |
|              | pIJ80   | pSCP103 derivative, <i>aphI</i>                                                                                                                                |                                                                                                                                                                                                                                                                                                                                                                                                                                                                       | 6                      |
|              | pKC505  | 18.7 kb<br>pSCP103 derivative, SCP2* replication and<br>fertility function, <i>ori</i> ( <i>E. coli</i> ), <i>acc(3)IV</i>                                     | - shuttle cosmid vector<br>- can be conjugally transferred between different streptomycetes                                                                                                                                                                                                                                                                                                                                                                           | 48                     |
|              | pMT603  | 18.7 kb<br>pSCP103 derivative<br><i>tsr</i> , <i>mel</i> gene (melanin production)                                                                             | - cloning vector (pMT603) based on the low copy number plasmid SCP2*<br>- pMT603 is unstable because it lacks the SCP2* stability region                                                                                                                                                                                                                                                                                                                              | 49                     |
|              | pRM5    | pSCP103 derivative, transfer and stability<br>region were deleted, includes pBR327 parts, <i>tsr</i>                                                           | - designed for cloning (and expression) polyketide biosynthetic gene clusters<br>(combinatorial biosynthesis)                                                                                                                                                                                                                                                                                                                                                         | 50                     |
|              | pHJL401 | 5.9 kb, higher copy number pSCP103-derivative<br><i>E. coli</i> replicon (pUC19)                                                                               | - shuttle vectors<br>- the region around the replication origin of pSCP103 was used for<br>construction of pHJL401, which resulted in an increased copy number vector<br>(10 copies)                                                                                                                                                                                                                                                                                  | 20                     |
|              | pKC1064 | 10 kb, <i>ori</i> (SPC2*), <i>lacZα</i> (MCS),<br><i>P<sub>tipA</sub></i> , <i>tfd</i> ( <i>ter</i> ), <i>ori</i> (pUC vector), <i>bla</i> , <i>oriT</i> (RK4) | - cloning and expression vector<br>- gene expression under the control of the inducible <i>tipA</i> promoter                                                                                                                                                                                                                                                                                                                                                          | 51                     |
|              | pKC1218 | 5.8 kb, <i>ori</i> (SPC2*), <i>lacZα</i> (MCS),<br><i>ori</i> (pUC18), <i>acc(3)IV</i> , <i>oriT</i> (RK2)                                                     | - replicates autonomously in actinomycetes ( <i>Streptomyces</i> )<br>- for gene expression                                                                                                                                                                                                                                                                                                                                                                           | 7                      |
|              | pIJ4231 | pSCP103 derivative (see below, pSCP103),<br>IS117 integration site, <i>vph</i> , <i>hph<sup>R</sup></i>                                                        | - transfer-proficient SCP2* derivative containing a cloned IS117 <i>attB</i> site<br>- used for gene expression                                                                                                                                                                                                                                                                                                                                                       | 52                     |
| <b>SLP1</b>  |         | 17.2 kb                                                                                                                                                        | - SLP1 plasmids found in <i>Streptomyces lividans</i> after mating with <i>S. coelicolor</i> strain A3(2) originate as deletion mutants of a 17 kb segment of the <i>S. coelicolor</i> chromosome<br>- integrates into specific, highly conserved chromosomal tRNA gene (40 bp copy of the 3' end of the respective tRNA <sup>Tyr</sup> gene)<br>- deletion mutants of SLP1 resulted in formation of autonomously replicating, conjugative, pock-forming CCC plasmids | 53                     |

|                                                     |                                                         |                                                                                                                                                                                                                                                                     |                                                                                                                                                                                                                                                         |              |
|-----------------------------------------------------|---------------------------------------------------------|---------------------------------------------------------------------------------------------------------------------------------------------------------------------------------------------------------------------------------------------------------------------|---------------------------------------------------------------------------------------------------------------------------------------------------------------------------------------------------------------------------------------------------------|--------------|
|                                                     | pCAO106                                                 | 21.1 kb, SLP1 derivative, <i>bla</i> , transfer and replication function, <i>attP</i> , Kan <sup>R</sup> , <i>ori</i> (p15A)                                                                                                                                        | -integrate into <i>S. lividans</i> chromosome via <i>attP</i> site, is transfer-proficient and forms pocks                                                                                                                                              | 6            |
|                                                     | pCAO170                                                 | SLP1/ derivative, pCAO106 containing <i>tsr</i>                                                                                                                                                                                                                     | -integrate into <i>S. lividans</i> chromosome via <i>attP</i> site, is transfer proficient and forms pocks                                                                                                                                              | 6            |
| <b>3. Plasmids containing transposable elements</b> |                                                         |                                                                                                                                                                                                                                                                     |                                                                                                                                                                                                                                                         |              |
|                                                     | pIJ4201,<br>pIJ4210,<br>pIJ4696,<br>pIJ4698,<br>pIJ4700 | see 1. Integrating shuttle plasmids                                                                                                                                                                                                                                 |                                                                                                                                                                                                                                                         |              |
|                                                     | pCZA163                                                 | 5.8 kb, <i>ori</i> (pUC19), <i>bla</i> <i>orfA</i> upstream and <i>orfB</i> downstream of the <i>acc(3)IV</i> , <i>P<sub>lac</sub></i> upstream of the Tn5096                                                                                                       | - transposon mutagenesis<br>- shuttle vector                                                                                                                                                                                                            | 54           |
|                                                     | pOJ446                                                  | 10.4 kb cosmid, <i>ori</i> (SCP2*), ( <i>cos</i> )3 <sup>λ</sup> , <i>rep</i> (pUC), <i>oriT</i> RK2, <i>acc(3)IV</i>                                                                                                                                               | - cloning vectors (derived from pKC505) for the conjugal transfer of DNA from <i>E. coli</i> to actinomycetes<br>- autonomous replication, or site-specific integration at the bacteriophage ΦC31 attachment site                                       | 7; 55        |
|                                                     | pCZA258                                                 | 6.9 kb, <i>ori</i> (ColEI), <i>P<sub>lac</sub></i> , MCS, <i>hph<sup>R</sup></i> , Tn5099-10, <i>orfA</i> upstream and <i>orfB</i> downstream-PstI and SphI sites, <i>oriT</i> (RK2), <i>bla</i>                                                                    | - transposon integration<br>- shuttle vector                                                                                                                                                                                                            | 38           |
|                                                     | pCZA276                                                 | 7 kb, <i>ori</i> (pUC19), <i>P<sub>lac</sub></i> , MCS, <i>hph<sup>R</sup></i> , Tn5100-4, <i>orfA</i> upstream and <i>orfB</i> downstream-PstI and SphI sites ( <i>orfA-orfB</i> are in the opposite direction compared to pCZA258), <i>oriT</i> (RK2), <i>bla</i> | - shuttle vector<br>- the ORFA-ORFB is in the opposite direction compared to pCZA258                                                                                                                                                                    | 38           |
| <b>4. λ cosmid vectors</b>                          |                                                         |                                                                                                                                                                                                                                                                     |                                                                                                                                                                                                                                                         |              |
|                                                     | pOJ446                                                  | 10.4 kb cosmid, <i>ori</i> (SCP2*), ( <i>cos</i> )3 <sup>λ</sup> , <i>rep</i> (pUC), <i>oriT</i> RK2, <i>acc(3)IV</i>                                                                                                                                               |                                                                                                                                                                                                                                                         |              |
|                                                     | SuperCos1 or pSuperCos1                                 | - 8 kb cosmid, <i>ori</i> (SV40), ( <i>cos</i> )2 sites, MCS, <i>bla</i> , <i>ori</i> (ColEI), <i>aphII</i>                                                                                                                                                         | - selection on kanamycin<br>- size limitation: 36-53 kb insert (allowing packaging into λ head)                                                                                                                                                         | 56; 57       |
|                                                     | pOJ436                                                  | see 1. Integrating shuttle plasmids                                                                                                                                                                                                                                 |                                                                                                                                                                                                                                                         |              |
|                                                     | pHZ1358                                                 | see, 2. pIJ101 derivatives                                                                                                                                                                                                                                          |                                                                                                                                                                                                                                                         |              |
|                                                     | pKC505                                                  | see 2. SCP2* derivatives                                                                                                                                                                                                                                            |                                                                                                                                                                                                                                                         |              |
| <b>5. Phage-derived integrating plasmids</b>        |                                                         |                                                                                                                                                                                                                                                                     |                                                                                                                                                                                                                                                         |              |
|                                                     | <b>pSAM2</b>                                            | 11-kb, <i>attP</i> , <i>int</i> , <i>ds</i> origin of replication, <i>rep</i> operon (replication), <i>xis</i> , <i>tra</i> , <i>spd</i> , <i>kor</i> , <i>pra</i> and <i>orf131</i> (regulatory genes)                                                             | - phage-derived integrative, conjugative vector<br>- integrates into specific, highly conserved chromosomal tRNA gene (40 bp copy of the 3' end of the respective tRNA <sub>P<sub>ro</sub></sub> gene)<br>- the plasmid can reintegrate from the genome | 58; 59       |
|                                                     | pPM927                                                  | integrative vectors (integration in non-tRNA sequence)                                                                                                                                                                                                              | - mostly conjugative and integrative plasmids, which can be used for gene                                                                                                                                                                               | 60; 6; 61,62 |

|                              |                      |                                                                                                                                                                                                                                                                              |                                                                                                                                                                                                                                                                               |                                                                         |
|------------------------------|----------------------|------------------------------------------------------------------------------------------------------------------------------------------------------------------------------------------------------------------------------------------------------------------------------|-------------------------------------------------------------------------------------------------------------------------------------------------------------------------------------------------------------------------------------------------------------------------------|-------------------------------------------------------------------------|
|                              |                      | possible)                                                                                                                                                                                                                                                                    | expression<br>- wide host range                                                                                                                                                                                                                                               |                                                                         |
| <b>ΦC31 phage</b>            | ΦC31-derived vectors | phage-derived integrating vectors                                                                                                                                                                                                                                            | - mostly conjugative and integrative plasmids, which can be used for gene expression<br>- integrate more efficiently compared to pSAM2 vectors                                                                                                                                | 63; 64; 65; 66; 67; 68; 69; 70;<br>71; 72; 73; 74; 75; 76; 77; 78;<br>7 |
|                              | pIJ8600              | see 1. Integrating shuttle plasmids                                                                                                                                                                                                                                          |                                                                                                                                                                                                                                                                               |                                                                         |
|                              | pIJ8630 and pIJ8660  | see 1. Integrating shuttle plasmids                                                                                                                                                                                                                                          |                                                                                                                                                                                                                                                                               |                                                                         |
|                              | pOJ446               | see 3. Plasmids containing transposable elements                                                                                                                                                                                                                             |                                                                                                                                                                                                                                                                               |                                                                         |
|                              | KC515                | -38.3 kb, $\Delta attP$ , phage ΦC31-based cloning vectors<br>- <i>vph</i> gene (promoterless viomycin phosphotransferase gene conferring resistance), <i>tsr</i>                                                                                                            | - phage KC515-derived systems are used for gene disruption and replacement<br>- contains single sites for the enzymes <i>Bam</i> HI, <i>Bgl</i> III, <i>Pst</i> I, <i>Pvu</i> II, <i>Sst</i> I (two sites) and <i>Xho</i> I, available for the insertion of DNA of up to 4 kb | 79; 80                                                                  |
|                              | KC516                | 38.3 kb, $\Delta attP$ , phage ΦC31-based cloning vectors<br><i>vph</i> gene, <i>tsr</i>                                                                                                                                                                                     | allows DNA insert of up to 4-4.5 kb                                                                                                                                                                                                                                           | 79                                                                      |
|                              | KC857                | 40.1 kb, $\Delta attP$ , phage ΦC31-based cloning vectors<br><i>vph</i> gene, <i>tsr</i> , <i>xylE</i> reporter gene, <i>ter</i> (fd) ( <i>ter</i> )                                                                                                                         | - allows DNA insert of up to 2.2 kb<br>- useful for <i>in situ</i> fusion to <i>xylE</i>                                                                                                                                                                                      | 6                                                                       |
|                              | PM8                  | 39.0 kb, $\Delta attP$ , phage ΦC31-based cloning vectors<br><i>hph</i> <sup>R</sup> , <i>tsr</i> , <i>xylE</i> reporter gene, <i>ter</i> (fd) ( <i>ter</i> )                                                                                                                | - allows insertion of up to 3.3 kb                                                                                                                                                                                                                                            | 6                                                                       |
| <b>6. Expression vectors</b> |                      |                                                                                                                                                                                                                                                                              |                                                                                                                                                                                                                                                                               |                                                                         |
|                              | pIJ8600, pMT3226     | see 1. Integrating shuttle plasmids                                                                                                                                                                                                                                          |                                                                                                                                                                                                                                                                               |                                                                         |
|                              | pANT1200-1202        | see 2. pIJ101 derivatives                                                                                                                                                                                                                                                    |                                                                                                                                                                                                                                                                               |                                                                         |
|                              | pCZA185              | see 2. pSG5 derivatives                                                                                                                                                                                                                                                      |                                                                                                                                                                                                                                                                               |                                                                         |
|                              | pKC1064              | see 2. SCP2* derivatives                                                                                                                                                                                                                                                     |                                                                                                                                                                                                                                                                               |                                                                         |
|                              | pRM5                 | see 2. SCP2* derivatives                                                                                                                                                                                                                                                     |                                                                                                                                                                                                                                                                               |                                                                         |
|                              | pANT849-851          | 5.3-5.8 kb, <i>ori</i> (pIJ101), <i>tsr</i> , <i>PsnpA</i> (small neutral protease SnpA promoter) upstream of the MCS, <i>snpR</i> (SnpA-regulator gene), <i>rep</i> (pIJ101) in pANT850-851, <i>aphI</i> gene                                                               | - for gene expression<br>- reporter protein levels up to 50-fold higher compared to <i>meIC1</i> promoter                                                                                                                                                                     | 81; 82; 83; 84, 85                                                      |
|                              | pIJ4123 and pIJ6021  | 9.2 kb (pIJ4123) and 7.8 kb (pIJ6021)<br>pIJ4123 and pIJ6021 differ in MCS<br>pIJ4123 contains a N-terminal His-Tag<br><i>ori</i> (pIJ101), <i>tsr</i> , Kan <sup>R</sup> gene under the control of <i>P<sub>tipA</sub></i> and <i>t0</i> , <i>ter</i> , <i>ori</i> (pIJ101) | - thiostrepton inducible <i>P<sub>tipA</sub></i><br>- <i>E. coli</i> - <i>Streptomyces</i> shuttle vectors for gene expression                                                                                                                                                | 86                                                                      |
|                              | pHZ1271-1272         | 10.2 kb (pHZ1272) and 11.7 kb (pHZ1271)<br>pHZ1271 and pHZ1272 differ in the MCS<br>pHZ1271 contains a N-terminal His-Tag                                                                                                                                                    | - high copy number<br>- structurally stable in <i>E. coli</i> and <i>Streptomyces lividans</i><br>- pIJ4123 and pIJ6021 derivatives                                                                                                                                           | 87                                                                      |

|             |        |                                                                                                                                                             |                                                                                                                                                                 |            |
|-------------|--------|-------------------------------------------------------------------------------------------------------------------------------------------------------------|-----------------------------------------------------------------------------------------------------------------------------------------------------------------|------------|
|             |        | <i>ori</i> (pIJ101), <i>tsr</i> , Kan <sup>R</sup> gene under the control of P <sub>tipA</sub> and <i>t0</i> , <i>ter</i> , <i>ori</i> (pBR322), <i>bla</i> | - <i>E. coli</i> - <i>Streptomyces</i> shuttle vectors for gene expression                                                                                      |            |
|             | pCJR24 | 4.6 kb, <i>ori</i> (pUC19), <i>tsr</i> , <i>actII-ORF4</i> with downstream actinorhodin promoters ( <i>PactI</i> and <i>PactIII</i> ), <i>bla</i>           | - <i>E. coli</i> - <i>Streptomyces</i> shuttle vectors for regulated gene expression of antibiotic biosynthesis genes                                           | 88         |
| <b>pJV1</b> |        | 11.1 kb, transfer region similar to pSN22                                                                                                                   | - wide host range<br>- several cloning vectors were derived from pJV1 (e.g. pB series or the cosmid vector pFD666)<br>- multicopy plasmid (replicative plasmid) | 89; 90; 30 |

## 7. Unstable and temperature sensitive plasmids

|  |                              |                                                                                                                                                                                                                                                                                                                           |                                                                                                                                                                                                                                                                |                |
|--|------------------------------|---------------------------------------------------------------------------------------------------------------------------------------------------------------------------------------------------------------------------------------------------------------------------------------------------------------------------|----------------------------------------------------------------------------------------------------------------------------------------------------------------------------------------------------------------------------------------------------------------|----------------|
|  | pHZ1351, pHZ1358, and pMT660 | see 2.2 pIJ101 derivatives                                                                                                                                                                                                                                                                                                |                                                                                                                                                                                                                                                                |                |
|  | pCZA185                      | see 2. pSG5 derivatives                                                                                                                                                                                                                                                                                                   |                                                                                                                                                                                                                                                                |                |
|  | pCZA185 and pKC1139          | see 2. pSG5 derivatives                                                                                                                                                                                                                                                                                                   |                                                                                                                                                                                                                                                                |                |
|  | pIJ80 and pIJ4680            | see 2. SCP2* derivatives                                                                                                                                                                                                                                                                                                  |                                                                                                                                                                                                                                                                |                |
|  | pHZ132                       | see 2. pSG5 derivatives                                                                                                                                                                                                                                                                                                   |                                                                                                                                                                                                                                                                |                |
|  | pGM9                         | 6.2 kb, <i>rep</i> (pSG5), <i>ori</i> (pSG5), <i>ts</i> , <i>tsr</i> , <i>Ble<sup>R</sup></i> , <i>aphII</i>                                                                                                                                                                                                              | - naturally <i>ts</i> for replication<br>- for gene expression                                                                                                                                                                                                 | 34; 91; 35; 36 |
|  | pGM11                        | 5.3 kb, <i>rep</i> (pSG5), <i>ts</i> , <i>ori</i> (pSG5), <i>aphII</i> , <i>ter</i>                                                                                                                                                                                                                                       | - naturally <i>ts</i> for replication<br>- for gene expression<br>- <i>aacC1</i> not expressed (lacks promoter)                                                                                                                                                | 34; 91; 35; 36 |
|  | pGM16-17                     | pGM16 (5.1 kb) and pGM17 (6.8 kb) contain different selection markers, <i>rep</i> (pSG5), <i>ori</i> (pSG5), <i>ts</i><br>pGM16: <i>tsr</i> , <i>Ble<sup>R</sup></i> with an upstream promoter of <i>aphII</i> from Tn5 and MCS<br>pGM17: <i>tsr</i> was replaced by <i>cat</i> , <i>ble<sup>R</sup></i> and <i>aphII</i> | - naturally <i>ts</i> for replication<br>- for gene expression                                                                                                                                                                                                 | 34; 92         |
|  | pGM160                       | - approx. 7.8 kb, <i>ori</i> (pSG5), <i>rep</i> (pSG5), <i>ts</i> , <i>aacC1</i> , <i>Ble<sup>R</sup></i> .                                                                                                                                                                                                               | - <i>E. coli</i> - <i>Streptomyces</i> shuttle vector (bifunctional pSG5-derived vector)<br>- naturally <i>ts</i> for replication<br>- can be used for gene expression (at 28°C-30°C) and for integration into the genome (at 37°C-39°C and without selection) | 34; 92; 93     |

## 8. Examples of CRISPR-vectors

|                                  |               |                                                                                                                                                                                                  |                                                                                                                     |        |
|----------------------------------|---------------|--------------------------------------------------------------------------------------------------------------------------------------------------------------------------------------------------|---------------------------------------------------------------------------------------------------------------------|--------|
| <b>pSG5-derivative, pJVD52.1</b> | pCRISP omyces | 11.4 kb, <i>oriT</i> , <i>rpsL</i> promoter, <i>cas9</i> , <i>gapdh</i> promoter, <i>lacZα</i> cloning site, P <sub>T7/T3</sub> promoter, gRNA site, <i>ori</i> , <i>bla</i> , <i>rep</i> (pSG5) | - multiplex genome editing of <i>Streptomyces</i> species<br>- <i>Streptomyces</i> codon-optimized <i>cas9</i> gene | 94; 95 |
|----------------------------------|---------------|--------------------------------------------------------------------------------------------------------------------------------------------------------------------------------------------------|---------------------------------------------------------------------------------------------------------------------|--------|

|                                  |                                           |                                                                                                                                                                                                                                         |                                                                                                                                                                                                     |                                    |
|----------------------------------|-------------------------------------------|-----------------------------------------------------------------------------------------------------------------------------------------------------------------------------------------------------------------------------------------|-----------------------------------------------------------------------------------------------------------------------------------------------------------------------------------------------------|------------------------------------|
| <b>pSG5-derivative</b> , pGM1190 | pCRISPR-Cas9                              | 11.2 kb, the <i>S. coelicolor</i> -codon optimized <i>cas9</i> gene was cloned into the vector pGM1190<br>pGM1190: <i>ts</i> , <i>tsr</i> , <i>aac(3)IV</i> , <i>oriT</i> , <i>t0</i> ter, RBS, <i>P<sub>tipA</sub></i> , <i>fd</i> ter | - multiplex genome editing of <i>Streptomyces</i> species<br>- <i>S. coelicolor</i> -codon optimized <i>cas9</i> gene                                                                               | 34; 92; 93; 96                     |
| <b>9. Other plasmids/vectors</b> |                                           |                                                                                                                                                                                                                                         |                                                                                                                                                                                                     |                                    |
| <b>SLP1</b>                      |                                           | see, <b>1.5 SLP1 derivatives</b> for SLP1 plasmid                                                                                                                                                                                       |                                                                                                                                                                                                     |                                    |
|                                  | pIJ61                                     | 15.7 kb, <i>attP</i> was replaced by <i>aphII</i> , <i>tsr</i>                                                                                                                                                                          | - bifunctional plasmid ( <i>E. coli</i> - <i>Streptomyces</i> shuttle vector)<br>- non-integrating, autonomous conjugative, self-transmissible, pock-forming CCC plasmid, with a copy number of 4-5 | 97; 98;99                          |
| pBR327                           | pBR327 derivatives                        | 3.2 kb, derived from pBR322<br><i>ori</i> , <i>bla</i> , Tet <sup>R</sup>                                                                                                                                                               | parts of the vector were used for the construction of hybrid vectors (e.g. <i>E. coli</i> - <i>Streptomyces</i> shuttle vector)                                                                     | 100; 101; 102; 103; 104; 105, 106; |
|                                  | pGUS derivatives based on pKCLP2, pKC1139 | <i>gusA</i> as reporter system                                                                                                                                                                                                          | mostly used for knock-in/knock-outs                                                                                                                                                                 | 107; 108; 109, 110                 |

Abbreviations: *aacC1*= gentamicin resistance gene, *aadA*= aminoglycoside resistance gene, *acc(3)IV*= apramycin resistance gene, *aphI*= kanamycin resistance gene, *aphII*= neomycin resistance, *att*= attachment site, *bla*= ampicillin resistance gene, Ble<sup>R</sup>= bleomycin resistance, *cat*= chloramphenicol resistance gene, *clt*= cis-acting transfer function (*oriT*-related), *egfp*= gene encoding recombinant Green Fluorescence Protein, *fd*= transcriptional terminator, *gyIR*= cassette for glycerol inducible gene expression, *gusA*= GusA directs conversion of X-Gluc into coloured 5,5'-dibromo-4,4'-dichloroindigo, *hph*<sup>R</sup>= hygromycin resistance, *int*= integrase, Kan<sup>R</sup>= kanamycin resistance, *kilA*= promoter and amino-terminal region of *tra* (lethality in the absence of the KorA repressor), *kilB*= lethality in the absence of KorB, KorA=kill override (repressor for *tra* and the *korA* expression), KorB= regulator for *kilB*, LacZ $\alpha$ =  $\beta$ -galactosidase (first 59 residues), the  $\alpha$ -peptide, MCS= Multiple Cloning Sites, *orf*= open reading frame, *ori*= origin of replication, *P<sub>tipA</sub>*= thiostrepton inducible promoter, *P<sub>T7</sub>* / *T3*= T7/T3 promoters, *rep*= replicon region, RBS= Ribosome Binding Site, *snpR*= SnpA-regulator gene, *snpAp*= protease promoter, *spd*= spreading pock-formation, *spdAB*= spread genes, *sti*= strong incompatibility, Tet<sup>R</sup>= tetracycline resistance, *ter*= terminator, *ts*= temperature sensitive plasmid, *tra*= transfer gene, *tsr*= thiostrepton resistance gene, *vph*= viomycin resistance gene, *xylE*= reporter gene encoding catechol 2,3-dioxygenase,



## References

1. J. Sun, G. H. Kelemen, J. M. Fernandez-Abalos and M. J. Bibb, *Microbiology*, 1999, **145 ( Pt 9)**, 2221-2227.
2. D. Claessen, H. A. Wosten, G. van Keulen, O. G. Faber, A. M. Alves, W. G. Meijer and L. Dijkhuizen, *Mol Microbiol*, 2002, **44**, 1483-1492.
3. A. Sola-Landa, A. Rodriguez-Garcia, E. Franco-Dominguez and J. F. Martin, *Mol Microbiol*, 2005, **56**, 1373-1385.
4. J. L. Marsh, M. Erfle and E. J. Wykes, *Gene*, 1984, **32**, 481-485.
5. L. Van Mellaert, L. Mei, E. Lammertyn, S. Schacht and J. Anne, *Microbiology*, 1998, **144 ( Pt 12)**, 3351-3358.
6. T. Kieser, M. J. Bibb, M. J. Buttner, K. F. Chater and D. A. Hopwood, *John Innes Foundation, Norwich, U.K.*, 2000.
7. M. Bierman, R. Logan, K. O'Brien, E. T. Seno, R. N. Rao and B. E. Schoner, *Gene*, 1992, **116**, 43-49.
8. C. J. Wilkinson, Z. A. Hughes-Thomas, C. J. Martin, I. Bohm, T. Mironenko, M. Deacon, M. Wheatcroft, G. Wirtz, J. Staunton and P. F. Leadlay, *J Mol Microbiol Biotechnol*, 2002, **4**, 417-426.
9. P. Matsushima and R. H. Baltz, *Microbiology* 1994, **140**, 139-143.
10. P. Matsushima and R. H. Baltz, *Microbiology*, 1996, **142 ( Pt 2)**, 261-267.
11. D. Kallifidas, G. Jiang, Y. Ding and H. Luesch, *Microb Cell Fact*, 2018, **17**, 25.
12. D. J. Lydiate, H. Ikeda and D. A. Hopwood, *Mol Gen Genet*, 1986, **203**, 79-88.
13. D. J. Lydiate, A. M. Ashby, D. H. Henderson, H. M. Kieser and D. A. Hopwood, *Microbiology*, 1989, **4**, 941-955.
14. A. Bhatt and T. Kieser, *Microbiology*, 1999, **145 ( Pt 5)**, 1201-1207.
15. A. Bhatt, H. M. Kieser, R. E. Melton and T. Kieser, *Mol Microbiol*, 2002, **43**, 135-146.
16. T. Smokvina, D. J. Henderson, R. E. Melton, D. F. Brolle, T. Kieser and D. A. Hopwood, *Mol Microbiol*, 1994, **12**, 459-468.
17. H. Motamedi, A. Shafiee and S. J. Cai, *Gene*, 1995, **160**, 25-31.
18. M. S. Paget, G. Hintermann and C. P. Smith, *Gene*, 1994, **146**, 105-110.
19. M. J. Bibb, G. R. Janssen and J. M. Ward, *Gene*, 1985, **38**, 215-226.
20. J. L. Larson and C. L. Hershberger, *Plasmid*, 1986, **15**, 199-209.
21. T. Kieser, D. A. Hopwood, H. M. Wright and C. J. Thompson, *Mol Gen Genet*, 1982, **185**, 223-228.
22. K. J. Kendall and S. N. Cohen, *J Bacteriol*, 1988, **170**, 4634-4651.
23. T. Kieser and R. E. Melton, *Gene*, 1988, **65**, 83-91.
24. Y. Murooka, T. Ishizaki, O. Nimi and N. Maekawa, *Appl Environ Microbiol*, 1986, **52**, 1382-1385.
25. J. M. Ward, G. R. Janssen, T. Kieser, M. J. Bibb, M. J. Buttner and M. J. Bibb, *Mol Gen Genet*, 1986, **203**, 468-478.
26. S. Herai, Y. Hashimoto, H. Higashibata, H. Maseda, H. Ikeda, S. Omura and M. Kobayashi, *Proc Natl Acad Sci U S A*, 2004, **101**, 14031-14035.
27. F. Rafii and D. L. Crawford, *Appl Environ Microbiol*, 1988, **54**, 1334-1340.
28. C. A. Wrigley-Jones, H. Richards, C. R. Thomas and J. Ward, *Biotechnol Bioeng*, 1993, **41**, 148-155.
29. A. W. Birch and J. Cullum, *J Gen Microbiol*, 1985, **131**, 1299-1303.
30. J. Vara, M. Lewandowska-Skarbek, Y. G. Wang, S. Donadio and C. R. Hutchinson, *J Bacteriol*, 1989, **171**, 5872-5881.
31. V. Mohrle, U. Roos and C. Bormann, *Mol Microbiol*, 1995, **15**, 561-571.
32. S. Banos, R. Perez-Redondo, B. Koekman and P. Liras, *Appl Environ Microbiol*, 2009, **75**, 2991-2995.

33. J. Nikodinovic and N. D. Priestley, *Plasmid*, 2006, **56**, 223-227.
34. G. Muth, B. Nußbaumer, W. Wohlleben and A. Pühler, *Mol Gen Genet* 1989, **219**, 341–348.
35. G. Muth, M. Farr, V. Hartmann and W. Wohlleben, *Plasmid*, 1995, **33**, 113-126.
36. R. M. Maas, J. Gotz, W. Wohlleben and G. Muth, *Microbiology*, 1998, **144 ( Pt 10)**, 2809-2817.
37. D. Du, L. Wang, Y. Tian, H. Liu, H. Tan and G. Niu, *Sci Rep*, 2015, **5**, 8740.
38. P. J. Solenberg and R. H. Baltz, *Gene*, 1994, **147**, 47-54.
39. H. Schrempf, H. Bujard, D. A. Hopwood and W. Goebel, *J Bacteriol*, 1975, **121**, 416-421.
40. M. J. Bibb, R. F. Freeman and D. A. Hopwood, *Mol Gen Genet*, 1977, **154**, 155–166.
41. M. J. Bibb and D. A. Hopwood, *J Gen Microbiol*, 1981, **126**, 427–442.
42. D. J. Lydiate, F. Malpartida and D. A. Hopwood, *Gene*, 1985, **35**, 223-235.
43. H. Kinashi, M. Shimaji-Murayama and T. Hanafusa, *Plasmid*, 1991, **26**, 123-130.
44. I. Haug, A. Weissenborn, D. Brolle, S. Bentley, T. Kieser and J. Altenbuchner, *Microbiology*, 2003, **149**, 505-513.
45. M. Bibb, J. L. Schottel and S. N. Cohen, *Nature*, 1980, **284**, 526-531.
46. F. Malpartida and D. A. Hopwood, *Nature*, 1984, **309**, 462-464.
47. B. Price, T. Adamidis, R. Kong and W. Champness, *J Bacteriol*, 1999, **181**, 6142-6151.
48. M. A. Richardson, S. Kuhstoss, P. Solenberg, N. A. Schaus and R. N. Rao, *Gene*, 1987, **61**, 231-241.
49. K. Kendall and J. Cullum, *Genet Res*, 1988, **51**, 71-74.
50. R. McDaniel, S. Ebert-Khosla, D. A. Hopwood and C. Khosla, *Science*, 1993, **262**, 1546-1550.
51. S. Kuhstoss and R. N. Rao, *J Mol Biol*, 1991, **222**, 897-908.
52. D. J. Henderson, D. F. Brolle, T. Kieser, R. E. Melton and D. A. Hopwood, *Mol Gen Genet*, 1990, **224**, 65-71.
53. C. A. Omer and S. N. Cohen, *Mol Gen Genet*, 1984, **196**, 429-438.
54. P. J. Solenberg and S. G. Burgett, *J Bacteriol*, 1989, **171**, 4807-4813.
55. R. N. Rao, M. A. Richardson and S. Kuhstoss, *Methods Enzymol*, 1987, **153**, 166-198.
56. M. Redenbach, H. M. Kieser, D. Denapaite, A. Eichner, J. Cullum, H. Kinashi and D. A. Hopwood, *Mol Microbiol*, 1996, **21**, 77-96.
57. G. A. Evans, K. Lewis and B. E. Rothenberg, *Gene*, 1989, **79**, 9-20.
58. J. L. Pernodet, J. M. Simonet and M. Guerineau, *Mol Gen Genet*, 1984, **198**, 35-41.
59. F. Boccard, T. Smokvina, J. L. Pernodet, A. Friedmann and M. Guerineau, *EMBO J*, 1989, **8**, 973-980.
60. S. Clerc and P. Simonet, *FEMS Microbiology Ecology*, 1996, **21**, 157–165.
61. C. Possoz, C. Ribard, J. Gagnat, J. L. Pernodet and M. Guerineau, *Mol Microbiol*, 2001, **42**, 159-166.
62. T. Smokvina, P. Mazodier, F. Boccard, C. J. Thompson and M. Guerineau, *Gene*, 1990, **94**, 53-59.
63. M. C. Smith, R. N. Burns, S. E. Wilson and M. A. Gregory, *Nucleic Acids Res*, 1999, **27**, 2145-2155.
64. C. J. Bruton, E. P. Guthrie and K. F. Chater, *Biotechnology (N Y)*, 1991, **9**, 652-656.
65. K. F. Chater, C. J. Bruton, W. Springer and J. E. Suarez, *Gene*, 1981, **15**, 249-256.
66. K. F. Chater, C. J. Bruton and J. E. Suarez, *Gene*, 1981, **14**, 183-194.
67. R. W. Hendrix, M. C. Smith, R. N. Burns, M. E. Ford and G. F. Hatfull, *Proc Natl Acad Sci U S A*, 1999, **96**, 2192-2197.
68. C. W. Howe and M. C. Smith, *J Bacteriol*, 1996, **178**, 2127-2130.
69. C. W. Howe and M. C. Smith, *Microbiology*, 1996, **142 ( Pt 6)**, 1357-1367.
70. C. J. Ingham, H. J. Crombie, C. J. Bruton, K. F. Chater, N. M. Hartley, G. J. Murphy and M. C. Smith, *Mol Microbiol*, 1993, **9**, 1267-1274.
71. C. J. Ingham, C. E. Owen, S. E. Wilson, I. S. Hunter and M. C. Smith, *Nucleic Acids Res*, 1994, **22**, 821-827.
72. C. J. Ingham, I. S. Hunter and M. C. Smith, *Nucleic Acids Res*, 1995, **23**, 370-376.
73. C. J. Ingham and M. C. Smith, *Gene*, 1992, **122**, 77-84.

74. M. C. Smith and C. E. Owen, *Mol Microbiol*, 1991, **5**, 2833-2844.
75. M. C. Smith, C. J. Ingham, C. E. Owen and N. T. Wood, *Gene*, 1992, **115**, 43-48.
76. H. M. Thorpe and M. C. Smith, *Proc Natl Acad Sci U S A*, 1998, **95**, 5505-5510.
77. S. E. Wilson, C. J. Ingham, I. S. Hunter and M. C. Smith, *Mol Microbiol*, 1995, **16**, 131-143.
78. S. E. Wilson and M. C. Smith, *Nucleic Acids Res*, 1998, **26**, 2457-2463.
79. M. R. Rodicio, C. J. Bruton and K. F. Chater, *Gene*, 1985, **34**, 283-292.
80. M. Carmody, B. Byrne, B. Murphy, C. Breen, S. Lynch, E. Flood, S. Finnan and P. Caffrey, *Gene*, 2004, **343**, 107-115.
81. J. S. Lampel, J. S. Aphale, K. A. Lampel and W. R. Strohl, *J Bacteriol*, 1992, **174**, 2797-2808.
82. M. L. Dickens and W. R. Strohl, *J Bacteriol*, 1996, **178**, 3389-3395.
83. M. L. Dickens, J. Ye and W. R. Strohl, *J Bacteriol*, 1996, **178**, 3384-3388.
84. M. L. Dickens, N. D. Priestley and W. R. Strohl, *J Bacteriol*, 1997, **179**, 2641-2650.
85. C. L. DeSanti and W. R. Strohl, *Appl Environ Microbiol*, 2003, **69**, 1647-1654.
86. E. Takano, J. White, C. J. Thompson and M. J. Bibb, *Gene*, 1995, **166**, 133-137.
87. R. Yang, Z. Hu, Z. Deng and J. Li, *Chin J Biotechnol*, 1998, **14**, 1-8.
88. C. J. Rowe, J. Cortes, S. Gaisser, J. Staunton and P. F. Leadlay, *Gene*, 1998, **216**, 215-223.
89. M. Kataoka, T. Seki and T. Yoshida, *J Bacteriol*, 1991, **173**, 4220-4228.
90. M. Kataoka, Y. M. Kiyose, Y. Michisuji, T. Horiguchi, T. Seki and T. Yoshida, *Plasmid*, 1994, **32**, 55-69.
91. M. Roth, C. Hoffmeier, R. Geuther, G. Muth and W. Wohlleben, *Biotechnol Lett*, 1994, **16**, 1225-1230.
92. W. Wohlleben, V. Hartmann, D. Hillemann, K. Krey, G. Muth, B. Nussbaumer and S. Pelzer, *Acta Microbiol Immunol Hung*, 1994, **41**, 381-389.
93. G. Muth, *Appl Microbiol Biotechnol*, 2018, **102**, 9067-9080.
94. J. A. Blodgett, P. M. Thomas, G. Li, J. E. Velasquez, W. A. van der Donk, N. L. Kelleher and W. W. Metcalf, *Nat Chem Biol*, 2007, **3**, 480-485.
95. R. E. Cobb, Y. Wang and H. Zhao, *ACS Synth Biol*, 2015, **4**, 723-728.
96. Y. Tong, P. Charusanti, L. Zhang, T. Weber and S. Y. Lee, *ACS Synth Biol*, 2015, **4**, 1020-1029.
97. C. J. Thompson, T. Kieser, J. M. Ward and D. A. Hopwood, *Gene*, 1982, **20**, 51-62.
98. T. Kieser, *Plasmid*, 1984, **12**, 19-36.
99. E. Strauch, W. Wohlleben and A. Puhler, *J Basic Microbiol*, 1987, **27**, 449-455.
100. J. G. Sutcliffe, *Cold Spring Harb Symp Quant Biol*, 1979, **43 Pt 1**, 77-90.
101. F. Bolivar, R. L. Rodriguez, M. C. Betlach and H. W. Boyer, *Gene*, 1977, **2**, 75-93.
102. F. Bolivar, R. L. Rodriguez, P. J. Greene, M. C. Betlach, H. L. Heyneker, H. W. Boyer, J. H. Crosa and S. Falkow, *Gene*, 1977, **2**, 95-113.
103. X. Soberon, L. Covarrubias and F. Bolivar, *Gene*, 1980, **9**, 287-305.
104. L. Y. Fuchs, L. Covarrubias, L. Escalante, S. Sanchez and F. Bolivar, *Gene*, 1980, **10**, 39-46.
105. L. Covarrubias, L. Cervantes, A. Covarrubias, X. Soberon, I. Vichido, A. Blanco, Y. M. Kupersztoch-Portnoy and F. Bolivar, *Gene*, 1981, **13**, 25-35.
106. D. A. Hopwood, G. Hintermann, T. Kieser and H. M. Wright, *Plasmid*, 1984, **11**, 1-16.
107. M. Myronovskiy, E. Welle, V. Fedorenko and A. Luzhetskyy, *Appl Environ Microbiol*, 2011, **77**, 5370-5383.
108. R. A. Jefferson, *Nature*, 1989, **342**, 837-838.
109. R. A. Jefferson, T. A. Kavanagh and M. W. Bevan, *EMBO J*, 1987, **6**, 3901-3907.
110. T. Siegl and A. Luzhetskyy, *Antonie Van Leeuwenhoek*, 2012, **102**, 503-516.
